# Supplementary material for: Glycine and Folate Ameliorate Models of Congenital Sideroblastic Anemia
Source: PubMed Central journal article supplement (PMC4731144; doi:10.1371/journal.pgen.1005783), 2016-01-28
Supplement: pgen.1005783.s003.pdf [file pgen.1005783.s003.pdf]

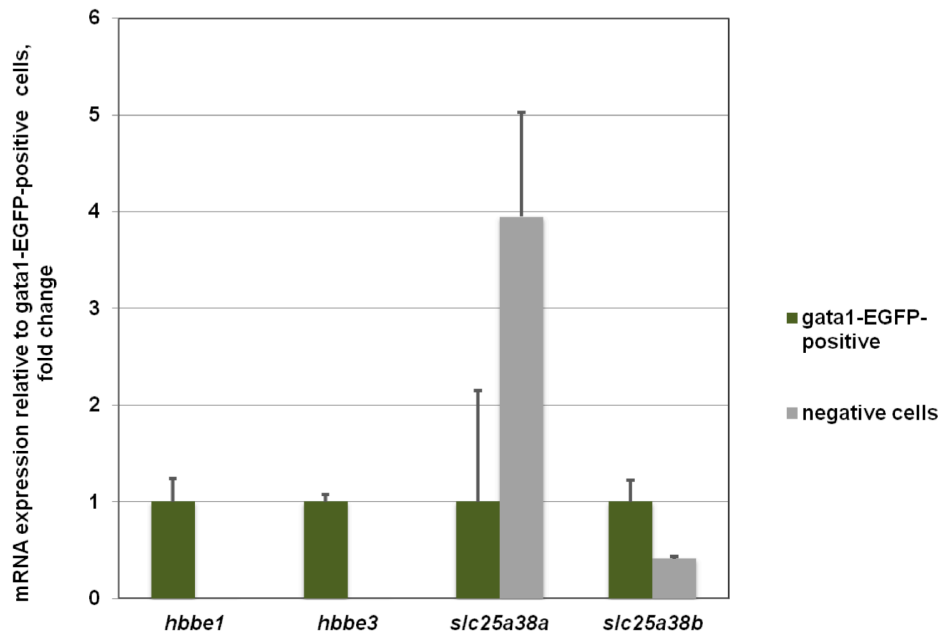

Supplementary Figure 3
